## **Title: Behavioral and neural dissociation of social anxiety and loneliness**

Jana Lieberz<sup>a,\*</sup>, Simone G. Shamay-Tsoory<sup>b</sup>, Nira Saporta<sup>b</sup>, Alisa Kanterman<sup>b</sup>, Timo Esser<sup>a</sup>, Ekaterina Kuskova<sup>a</sup>, Johannes Schultz<sup>c,d</sup>, René Hurlemann<sup>e,f</sup>, Dirk Scheele<sup>a,e,\*</sup>

<sup>a</sup> Division of Medical Psychology, Department of Psychiatry and Psychotherapy, University Hospital Bonn, 53127 Bonn, Germany

<sup>b</sup> Department of Psychology, University of Haifa, Haifa 3498838, Israel

<sup>c</sup> Center for Economics and Neuroscience, University of Bonn, 53127 Bonn, Germany

<sup>d</sup> Institute of Experimental Epileptology and Cognition Research, University of Bonn, 53127 Bonn, Germany

<sup>e</sup> Department of Psychiatry, School of Medicine & Health Sciences, University of Oldenburg, 26129 Oldenburg, Germany

<sup>f</sup> Research Center Neurosensory Science, University of Oldenburg, 26129 Oldenburg, Germany

\*Corresponding Authors:

Jana Lieberz, [jana.lieberz@hotmail.de](mailto:jana.lieberz@hotmail.de)

Dirk Scheele, [dirk-scheele@gmx.de](mailto:dirk-scheele@gmx.de)

**Keywords:** amygdala, fMRI, loneliness, striatum, social anxiety

1 **Abstract**

2

3 Loneliness is a public health concern with detrimental effects on physical and mental well-  
4 being. Given phenotypical overlaps between loneliness and social anxiety, cognitive  
5 behavioral interventions targeting social anxiety might be adopted to reduce loneliness.  
6 However, it is still elusive whether social anxiety and loneliness share the same underlying  
7 neurocognitive mechanisms. The current study aimed at investigating to what extent known  
8 behavioral and neural correlates of social avoidance in social anxiety are evident in loneliness.  
9 We used a pre-stratified approach involving 42 participants with high and 40 control  
10 participants with low loneliness scores. During functional magnetic resonance imaging (fMRI),  
11 the participants completed a social gambling task to measure the subjective value of engaging  
12 in a social situation and responses to positive and negative social feedback. Uni- and  
13 multivariate analyses of behavioral and fMRI data replicated known task effects across groups.  
14 However, although lonely participants were characterized by increased social anxiety,  
15 loneliness was associated with a response pattern clearly distinct from social anxiety.  
16 Specifically, Bayesian analyses revealed moderate evidence for equal subjective values of  
17 engaging in social situations and comparable amygdala responses to social decision-making  
18 and striatal responses to positive social feedback in both groups. Conversely, lonely  
19 participants showed significantly altered behavioral responsiveness to negative feedback and  
20 opposing striatal brain activity and connectivity compared to controls. Our findings suggest that  
21 loneliness is associated with altered emotional reactivity to social situations rather than  
22 behavioral tendencies to withdraw from social interactions. Thus, established interventions for  
23 social anxiety should be adjusted when targeting loneliness.

## 24 Introduction

25 Loneliness is a painful condition which can be a catalyst for subjective stress [1] and is  
26 associated with detrimental effects on mental and physical health [2,3]. As such, loneliness  
27 has been identified as a risk factor for premature mortality comparable with smoking or obesity  
28 [4,5]. Consequently, loneliness has come into focus of politics and clinicians as a major public  
29 health concern with high economic costs for society [6-8]. With social distancing in place in  
30 most countries around the world, COVID-19 is expected to have vast impact on physical and  
31 mental health, particularly in people inflicted by poor resilience to social adversity due to pre-  
32 existing low levels of social integration [9,10]. Preliminary evidence indicate that the prevalence  
33 of loneliness might have increased due to the ongoing COVID-19 pandemic, which  
34 emphasizes the urgent need of interventions to target loneliness [11-14].

35 Recent findings highlight a close link of loneliness with social anxiety symptoms [15-17] and  
36 identified social anxiety as predictor for future loneliness [18-20]. For instance, social anxiety  
37 was found to be consistently associated with social isolation, lower perceived social support,  
38 and decreased relationship satisfaction [21-23]. Moreover, poor friendship quality promotes  
39 increases in social anxiety symptomatology [24]. A perceived discrepancy in the quality and  
40 quantity of the actual and desired relationships, in turn, is a key feature of loneliness [25].  
41 Likewise, safety behavior such as the avoidance of social situations is known to be a core  
42 mechanism fostering the maintenance of social anxiety and is also hypothesized to be  
43 preferred by lonely individuals [26,27].

44 Given the phenotypical overlap between loneliness and social anxiety, cognitive behavioral  
45 therapies targeting social anxiety might be co-opted as interventions to reduce loneliness.  
46 Existing programs are often based on cognitive models of social anxiety [28], which posit an  
47 exaggerated fear of evaluation as a core etiological mechanism of psychopathology. Indeed,  
48 current neurocircuitry models of social anxiety disorder emphasize amygdala hyperreactivity  
49 to social stimuli [29,30] and we have recently observed increased amygdala responses during

50 social decision-making and social feedback in healthy individuals with high social anxiety [31].

51 By contrast, the neural responsiveness to social rewards such as happy faces seems to be  
52 reduced in individuals with social anxiety [31-34], potentially resulting in reduced positive affect  
53 in response to social interactions and impaired memory for positive social events [35,36].  
54 Similarly, lonely individuals exhibit an attenuated responsiveness to positive social interactions  
55 [37] and there is preliminary evidence indicating that alterations in amygdala structure and  
56 function are associated with loneliness (for a current comprehensive review of neurobiological  
57 factors associated with loneliness, see [38]). However, it is still elusive whether social anxiety  
58 and loneliness share similar neurobiological substrates during social interactions or whether  
59 psychotherapeutic protocols need to be adjusted to reduce chronic loneliness.

60 The current study therefore aims at examining whether previously reported mechanisms  
61 underlying social anxiety (cf. [31]) could be replicated in loneliness. Thus, we recruited a pre-  
62 stratified sample of 42 healthy participants scoring high (high-lonely, HL) and 40 control  
63 participants scoring low (low-lonely, LL) on a loneliness scale. During functional magnetic  
64 resonance imaging (fMRI), the participants completed a social gambling task to measure the  
65 subjective value of engaging in a social situation and responses to positive and negative social  
66 feedback. The task has been previously used to identify a potential neural circuitry underlying  
67 the social avoidance behavior associated with social anxiety (cf. [31]). Given the intertwined  
68 phenotype of both constructs, we hypothesized that lonely individuals would exhibit a  
69 decreased subjective value of engaging in social situations as observed for social anxiety.  
70 Likewise, we expected increased amygdala activation during social decision-making and social  
71 feedback and concomitantly decreased reward-associated responses of the nucleus  
72 accumbens (NAcc) to positive social feedback in lonely participants. We further tested whether  
73 changes in brain activity were associated with altered functional connectivity. In an additional  
74 exploratory analysis, we examined distinct behavioral and neural response patterns in  
75 loneliness that have not been previously found to be associated with social anxiety (i.e.,  
76 responsiveness to negative social feedback). Notably, we controlled for the influence of social

77 anxiety and further potential confounding variables including depressive symptomatology and  
78 childhood maltreatment for all observed associations of loneliness with neural or behavioral  
79 measurements.

## 80 **Materials and Methods**

81

### 82 **Participants**

83 We recruited a sample of 82 (out of a stratified sample of 3678 adults; 41 females, mean age  
84  $\pm$  standard deviation (SD):  $26.83 \pm 7.47$  years) pre-stratified healthy volunteers with high ( $n =$   
85 42) and low loneliness scores ( $n = 40$ ) as assessed by the revised version of the UCLA  
86 loneliness scale (UCLA-L, [39]; for details, see supplementary material and [37]). All  
87 participants gave written informed consent. The study was approved by the institutional review  
88 board of the Medical Faculty of the University of Bonn (study number 016/18) and conducted  
89 in accordance with the latest revision of the Declaration of Helsinki.

90

### 91 **Behavioral tasks**

92 We measured the participants' subjective value of engaging in social situations with a social  
93 gambling task (cf. [31] and see supplementary material). During a decision phase, participants  
94 could choose a risky (a dice game with a human or computer partner with equiprobable  
95 outcomes of 3 or 0 €) or a safe option (a fixed payoff ranging from 0 to 3 €). If participants  
96 chose the risky option, either a positive or a negative feedback video of the partner (human or  
97 computer) was shown (feedback phase), depending on the outcome of the trial (win or loss).  
98 If participants chose the safe option, a sentence confirmed the payoff. Individual certainty  
99 equivalents of the risky option (termed CE50), i.e., the certain payoff for which a participant  
100 would be indifferent between the risky and safe options (i.e., they would choose each option  
101 with equal probability), were estimated separately for the computer and the human partners by  
102 fitting participants' choices with a cumulative Gaussian function. CE20 and CE80, i.e., certain  
103 payoffs associated with choosing the safe option with 20 % and 80 % probability, were similarly  
104 estimated. The subjective value of engaging in social situations was defined as the individual

105 difference between the estimated CE50 for human partners compared to the computer partner.

106 After finishing the task, the pleasantness of each feedback video was rated on a visual  
107 analogue scale ranging from 0 (“not pleasant at all”) to 100 (“very pleasant”). The task was  
108 then repeated during functional magnetic resonance imaging (fMRI) with randomly chosen  
109 partners (human or computer) for each trial. The fixed payoff offered as safe option varied  
110 randomly between the individually determined values CE20, CE50, and CE80.

111 We further measured the individual monetary value associated with receiving positive or  
112 avoiding negative social feedback during a virtual auction task. Specifically, participants were  
113 informed that they were participating in a virtual auction against the computer using a random  
114 algorithm to invest money. Participants were then asked with no imposed time limit to invest  
115 any amount of money between 0 € and 1 € (in increments of 5 cents) to (1) increase the  
116 probability of watching a positive social feedback video or (2) to decrease the probability of  
117 watching a negative social feedback video (see supplementary material).

118

## 119 **Statistical analyses**

120 Behavioral data were analyzed in SPSS 24 (IBM Corp., Armonk, NY) by calculating analyses  
121 of variance (ANOVAs) and Bonferroni-corrected ( $P_{\text{cor}}$ ) post-hoc t-tests.  $P$ -values < 0.05 (two-  
122 tailed) were considered significant. To analyze the fMRI data, we used a two-stage approach  
123 as implemented in SPM12 (Wellcome Trust Center for Neuroimaging, London, UK;  
124 <http://www.fil.ion.ucl.ac.uk/spm>). On the first level, data were modeled using a fixed-effects  
125 model. Within-subject contrasts of interest were entered to a random-effects model on the  
126 second level to assess group-specific response patterns by calculating two-sample t-tests.  
127 Specifically, to probe the hypothesis of increased amygdala activation during social decision-  
128 making in HL participants, we compared brain activity during risky decisions involving a human  
129 partner between groups by calculating two-sample t-tests (i.e., HL risky decision human > safe decision human

130 > LL risky decision human > safe decision human, HL risky decision human > risky decision computer > LL risky decision human > risky  
131 decision computer). Likewise, the hypothesized increased amygdala responsiveness to social  
132 feedback (HL human feedback > computer feedback > LL human feedback > computer feedback) and reduced NAcc  
133 reactivity to positive social feedback (LL positive human feedback > positive computer feedback > HL positive human  
134 feedback > positive computer feedback) were tested by calculating two-sample t-tests. As the behavioral  
135 data indicated an altered responsiveness to negative social feedback (see results), we  
136 explored group differences in response to negative human feedback videos (HL negative human  
137 feedback > negative computer feedback > LL negative human feedback > negative computer feedback). These contrasts were  
138 also calculated in the opposite direction (e.g., LL risky decision human > risky decision computer > HL risky decision  
139 human > risky decision computer). The amygdala and NAcc were anatomically defined according to the  
140 Wake Forest University PickAtlas [40,41]. *P*-values < 0.05 after familywise error correction for  
141 multiple testing ( $P_{FWE}$ ) were considered significant. Parameter estimates of clusters showing  
142 significant group effects were extracted and further analyzed in SPSS 24 to disentangle the  
143 group x task condition interaction. Behavioral group effects were correlated with parameter  
144 estimates of neural group effects. For details, see supplementary material. The analysis plan  
145 was preregistered prior to conducting any analyses (<https://osf.io/x47ke>). All data used in this  
146 study are openly available (<https://osf.io/p6jxk/> and  
147 <https://neurovault.org/collections/VNYRMORR/>).

148

## 149 **Explorative analyses**

150 We conducted a multivariate pattern analysis using the Decoding Toolbox [42] to test whether  
151 decisions of the participants could be decoded from amygdala activation (cf. [31]). Contrasts  
152 revealing significant group effects in the univariate activity analyses (see above) were further  
153 examined by generalized psychophysiological interaction (gPPI) analyses using the CONN  
154 toolbox 19.b ([www.nitrc.org/projects/conn](http://www.nitrc.org/projects/conn), RRID:SCR\_009550). Mediation and moderation  
155 analyses were run to examine the potential influence of depressive and social anxiety



156 symptoms (assessed by the Beck's Depression Inventory II, BDI [43] and the Liebowitz Social  
157 Anxiety Scale, LSAS [44]) and childhood maltreatment (assessed by the Childhood Trauma  
158 Questionnaire, CTQ [45]) on observed loneliness effects. For hypotheses that could not be  
159 confirmed, we conducted Bayesian t-tests using JASP [46] to quantify the evidence for an  
160 absence of group differences. For details of the explorative analyses, see supplementary  
161 material.

162

163 **Results**

164

165 **Behavioral results**

166 As expected, social anxiety was significantly increased in HL participants ( $t(67.74) = 3.25, P =$   
167  $0.002, d = 0.72$ ; mean LSAS score  $\pm$  SD in HL:  $18.64 \pm 15.91$ ; LL:  $9.28 \pm 9.56$ ; see [37]) and  
168 task effects of the social gambling task reported by [31] were replicated across groups (see  
169 supplementary material and **Fig. 1A**). However, contrary to previously observed effects of  
170 social anxiety [31], loneliness (HL vs. LL) affected neither the subjective value of engaging in  
171 social situations during the behavioral social gambling task nor the invested money in the  
172 virtual auction task (all  $P$ s  $> 0.05$ ).

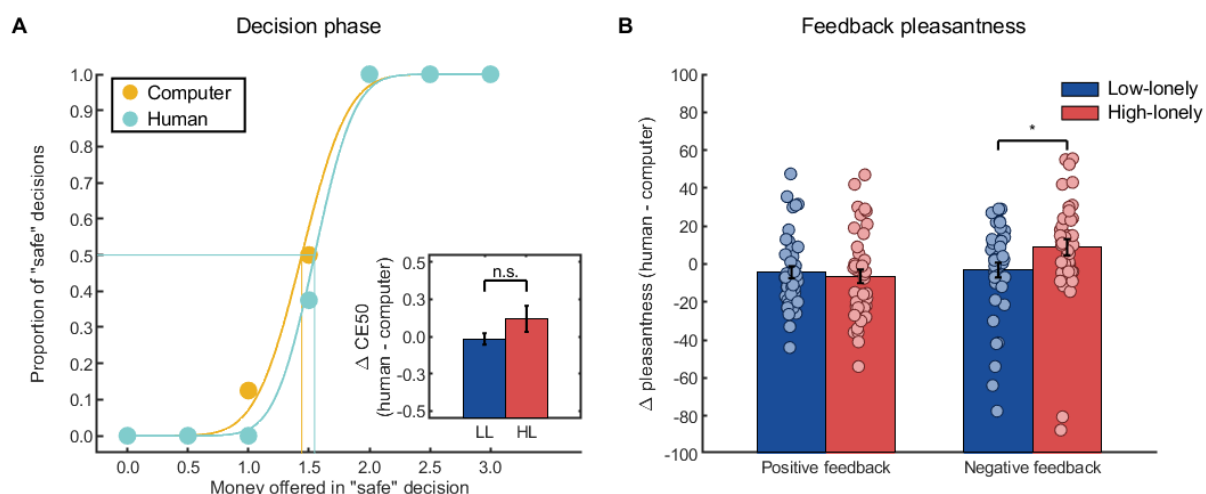

173

174 **Fig. 1. Behavioral results of the decision and feedback phase of the social gambling**  
175 **task.** (A) The proportion of safe decisions during the social gambling task increased with higher  
176 payoffs offered in those safe decisions (main effect of offered payoff for the behavioral task:  
177  $F(2.95,236.14) = 183.77, P < 0.001, \eta_p^2 = 0.70$ ; functional magnetic resonance imaging task:  
178  $F(2,158) = 185.43, P < 0.001, \eta_p^2 = 0.70$ ; example data of the behavioral task from one  
179 participant with a high loneliness score (HL) are presented). As presented in the inlay, HL  
180 participants did not significantly differ from control participants (LL) with regard to the subjective

181 value of engaging in a social situation (i.e., CE50, the payoff offered in the safe option  
182 associated with 50% of safe decisions). (B) By contrast, groups significantly differed in their  
183 pleasantness ratings of the negative feedback videos. Compared to the negative computer  
184 feedback video, HL participants rated the negative human feedback video as more pleasant,  
185 whereas LL control participants showed the opposite pattern of ratings. No differences  
186 between groups were observed for positive feedback. Each marker in (A) represents the mean  
187 of 8 trials. Bars represent group means. Error bars indicate standard errors of the mean.  
188 Abbreviations: n.s., not significant. \*  $P < 0.05$ .

189

190 Nevertheless, analyses of pleasantness ratings of the feedback videos revealed a significant  
191 interaction of group x partner x feedback valence ( $F(1,80) = 4.02$ ,  $P = 0.048$ ,  $\eta_p^2 = 0.05$ ). To  
192 disentangle the interaction, we calculated further mixed ANOVAs separately for the positive  
193 and negative feedback videos. Surprisingly, no group effects were observed for positive  
194 feedback (all  $P$ s  $> 0.05$ ), but HL participants rated the negative human feedback video as more  
195 pleasant compared to the negative computer feedback, while LL participants showed the  
196 opposite pattern of ratings (interaction of group x partner:  $F(1,80) = 4.34$ ,  $P = 0.04$ ,  $\eta_p^2 = 0.05$ ;  
197 see **Fig. 1B**).

198

## 199 **fMRI results**

200 Multi- and univariate analyses of neural activation across groups replicated all previous task  
201 effects [31]. As such, a linear support vector machine classifier based on amygdala activation  
202 was able to decode the decision (risky vs. safe) significantly better than chance (mean  
203 accuracy  $\pm$  SD =  $53.64 \pm 9.07$  %; 30, -4, ,28,  $t(73) = 3.45$ ,  $P_{FWE} = 0.048$ ). Amygdala activation  
204 increased during decisions involving a human partner compared to the computer partner (right:  
205 22, -6, -12,  $t(73) = 3.68$ ,  $P_{FWE} = 0.03$ ; left: -22, -8, -12,  $t(73) = 4.00$ ,  $P_{FWE} = 0.01$ ). Specifically,

206 amygdala activity was enhanced during trials in which participants chose the risky option with  
207 a human partner compared to the computer partner (right: 22, -6, -12,  $t(73) = 4.58$ ,  $P_{FWE} =$   
208 0.002; left: -22, -8, -12,  $t(73) = 4.23$ ,  $P_{FWE} = 0.006$ ; see **Fig. 2A**), while no differences in  
209 amygdala activity between partners were observed for safe decisions. Moreover, receiving  
210 feedback from the human partner activated the amygdala significantly stronger than computer  
211 feedback (right: 22, -6, -14,  $t(75) = 9.67$ ,  $P_{FWE} < 0.001$ , left: -22, -8, -12,  $t(75) = 9.66$ ,  $P_{FWE} <$   
212 0.001) and NAcc activity across partners was increased in response to positive feedback  
213 compared to negative feedback (right: 12, 8, -6,  $t(75) = 6.45$ ,  $P_{FWE} < 0.001$ , left: -14, 10 -10,  
214  $t(75) = 4.91$ ,  $P_{FWE} < 0.001$ ). See **Table S1** for a comprehensive presentation of whole-brain  
215 task effects.

216 Importantly, however, amygdala activation during the decision or feedback stage did not  
217 significantly differ between HL and LL participants. Conversely, we observed significant  
218 differences in striatal responses to the feedback videos. HL participants showed significantly  
219 smaller NAcc responses to human (vs. computer) feedback videos than LL individuals (14, 14,  
220 -10,  $t(74) = 3.07$ ,  $P_{FWE} = 0.02$ ). Again, the group difference was specific for negative feedback  
221 videos (14, 14, -10,  $t(74) = 3.21$ ,  $P_{FWE} = 0.01$ ; see supplementary material and **Fig. 2B**),  
222 whereas no significant group effects were observed for responses to positive feedback videos.  
223 Post-hoc tests revealed increased NAcc responsiveness to negative human feedback  
224 compared to the computer feedback in LL participants ( $t(36) = 2.59$ ,  $P_{cor} = 0.03$ ,  $d = 0.53$ ),  
225 while HL participants exhibited the opposite response pattern ( $t(38) = -1.96$ ,  $P_{cor} = 0.12$ ). No  
226 further group differences in brain activity were observed.

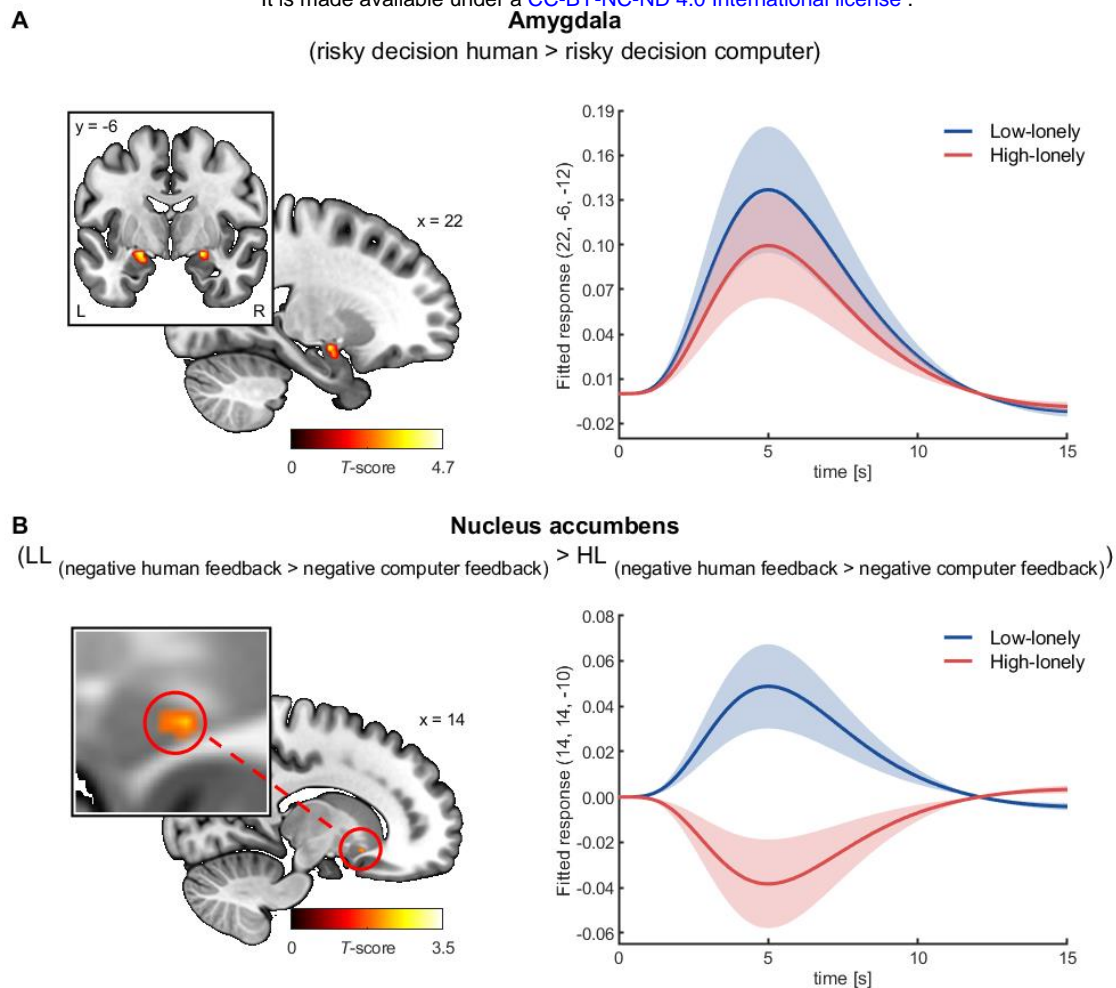

227

228 **Fig. 2. Neural activation during the social gambling task. (A)** Amygdala activity was  
 229 significantly enhanced during the decision phase of the social gambling task when participants  
 230 chose the risky option with a human partner compared to the computer partner (right: 22, -6, -  
 231 12,  $t(73) = 4.58$ ,  $P_{FWE} = 0.002$ ; left: -22, -8, -12,  $t(73) = 4.23$ ,  $P_{FWE} = 0.006$ ). In line with the  
 232 behavioral results, no group differences in neural activity were observed during the decision  
 233 phase. **(B)** During the feedback stage, participants with high loneliness scores (HL) showed  
 234 attenuated nucleus accumbens (NAcc) responses to negative feedback given by human  
 235 partners compared to the computer partner. In contrast, NAcc reactivity to negative human  
 236 feedback was enhanced compared to computer feedback in control participants (LL). Shaded  
 237 areas show the standard error of the mean of the fitted responses based on the hemodynamic

238 response function. For illustration purpose, clusters are shown with significance levels of  $P <$   
239 0.05 uncorrected. Abbreviations: L, left, R, right.

240

241 Exploratory gPPI analyses of the negative feedback condition with the NAcc serving as seed  
242 region indicated enhanced functional connectivity of the left NAcc with a cluster including the  
243 hippocampus in HL compared to LL participants (-14, -22, -14,  $k = 73$ ,  $t(74) = 5.38$ ,  $P_{FWE} =$   
244 0.049 on cluster level; see **Fig. 3A**). Again, post-hoc tests revealed an opposing pattern  
245 between groups with enhanced connectivity while receiving negative human (vs. computer)  
246 feedback in HL participants ( $t(38) = 3.06$ ,  $P_{cor} = 0.01$ ,  $d = 0.63$ ) and reduced connectivity in LL  
247 participants ( $t(36) = -4.93$ ,  $P_{cor} < 0.001$ ,  $d = -1.15$ ). Interestingly, NAcc-hippocampus  
248 connectivity not only correlated with NAcc responses to negative human feedback (contrasted  
249 with negative computer feedback:  $r(74) = -0.33$ ,  $P = 0.004$ , i.e., increased connectivity was  
250 associated with reduced neural reactivity), but also with pleasantness ratings of negative  
251 feedback videos ( $r(74) = 0.23$ ,  $P = 0.04$ , see **Fig. 3B**). The correlation between NAcc activity  
252 and negative feedback ratings was similar, but failed to reach significance ( $r(74) = -0.20$ ,  $P =$   
253 0.09).

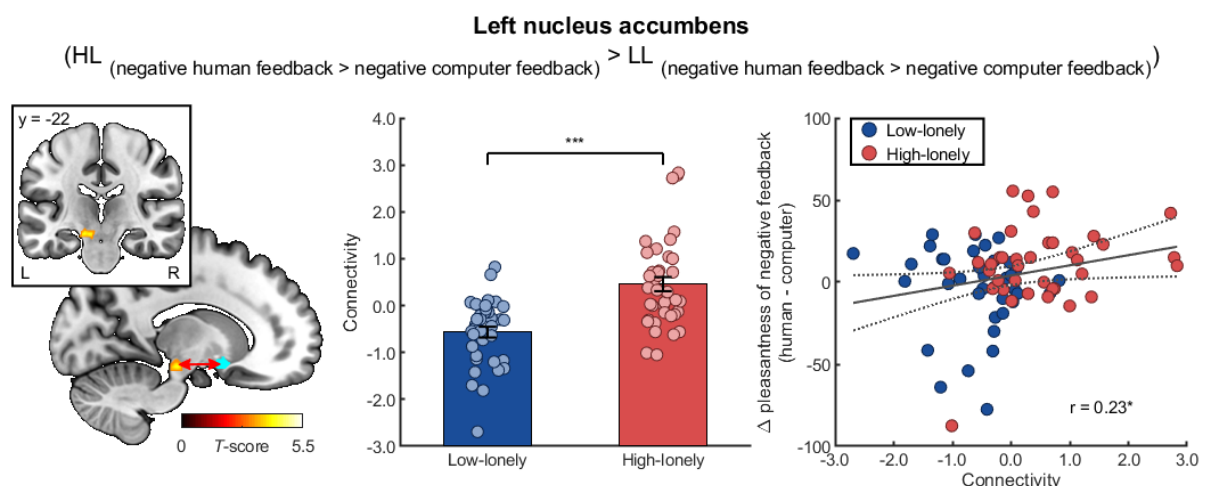

255 **Fig. 3. Functional connectivity during the social gambling task.** Participants with high  
256 loneliness scores (HL) showed enhanced functional connectivity of the nucleus accumbens

257 (blue sphere) with a cluster including the hippocampus while receiving negative human (vs.  
258 computer) feedback compared to control participants (LL). Functional connectivity positively  
259 correlated with the pleasantness ratings of the negative human feedback (compared to the  
260 negative computer feedback). The dashed line represents the 95%-confidence interval of the  
261 plotted regression line. Bars represent group means. Error bars indicate standard errors of the  
262 mean. Abbreviations: L, left, R, right. \*  $P < 0.05$ , \*\*\*  $P < 0.001$ .

263

## 264 **Bayesian analyses and effects of confounding variables**

265 Bayesian analyses revealed moderate evidence for the absence of group differences in  
266 variables that have previously been associated with social anxiety (cf. [31]), with our data being  
267 at least three times more likely under the null hypothesis ( $H_0$ : no differences between groups)  
268 than under the alternative hypothesis (HL differ from LL participants in any direction).  
269 Specifically, Bayesian t-tests revealed moderate evidence that HL participants indeed did not  
270 differ from LL participants regarding the pleasantness ratings of positive human compared to  
271 computer feedback as our data were found to be almost four times more likely under the  $H_0$   
272 than under the alternative hypothesis (Bayes factor ( $BF_{10}$ ) = 0.25, median effect size = 0.08,  
273 95 % credible interval: [-0.32, 0.49]). Likewise, Bayesian analyses revealed moderate evidence  
274 that groups showed equal reward-associated brain activity in response to positive human  
275 feedback (contrasted with positive computer feedback; left NAcc:  $BF_{10}$  = 0.25, median effect  
276 size = 0.07, 95 % credible interval: [-0.35, 0.49]; for the right NAcc the evidence is inconclusive:  
277  $BF_{10}$  = 0.43, median effect size = 0.23, 95 % credible interval: [-0.19, 0.66]) and moderate  
278 evidence in favor of the  $H_0$  for amygdala reactivity to human feedback (contrasted with  
279 computer feedback; left:  $BF_{10}$  = 0.24, median effect size = -0.004, 95 % credible interval: [-  
280 0.42, 0.41]; right:  $BF_{10}$  = 0.24, median effect size  $\approx$  0.00, 95 % credible interval: [-0.42, 0.42]).  
281 The same pattern of results was observed for amygdala activation during the decision stage  
282 of the social gambling task as our data were up to four times more likely under the assumption

283 of comparable activation between groups ( $H_0$ ) than under the alternative hypothesis (left  
284 amygdala activation for risky decisions with a human partner compared to a computer partner:  
285  $BF_{10} = 0.24$ , median effect size = 0.03, 95 % credible interval: [-0.39, 0.45]; left amygdala  
286 activation for risky decisions with a human partner contrasted with safe decisions in trials with  
287 a human partner:  $BF_{10} = 0.33$ , median effect size = -0.17, 95 % credible interval: [-0.61, 0.25];  
288 right:  $BF_{10} = 0.24$ , median effect size = -0.01, 95 % credible interval: [-0.43, 0.41]). For right  
289 amygdala activation, there was insufficient evidence to draw a conclusion for or against the  
290 hypothesis that groups exhibit equal responsiveness to risky decisions involving a human  
291 partner (contrasted with the computer;  $BF_{10} = 0.50$ , median effect size = 0.26, 95 % credible  
292 interval: [-0.16, 0.70]). However, descriptive analyses revealed an opposing response pattern  
293 in HL participants to what has been expected due to increased social anxiety symptoms. While  
294 LL participants showed slightly enhanced amygdala activation (mean parameter estimates  $\pm$   
295 SD:  $0.25 \pm 1.06$ ), amygdala activation was reduced in HL participants (mean parameter  
296 estimates  $\pm$  SD:  $-0.02 \pm 0.68$ ; cf. **Fig. 2A**). Likewise, no evidence for any of the hypotheses  
297 (null or alternative hypothesis) was observed for the subjective value of engaging in social  
298 situations ( $BF_{10} = 0.57$ , median effect size = -0.29, 95 % credible interval = [-0.74, 0.15]). Again,  
299 descriptive analyses revealed enhanced values of social engagement in HL compared to LL  
300 participants, which is contrary to the previously reported negative association with social  
301 anxiety (see inlay of **Fig. 1A** and cf. [31]). Regarding the invested money during the virtual  
302 auction task, Bayesian analyses provided moderate evidence for comparable investments  
303 between groups to avoid negative social feedback ( $BF_{10} = 0.33$ , median effect size = 0.17, 95  
304 % credible interval = [-0.23, 0.59]) or to receive positive social feedback ( $BF_{10} = 0.33$ , median  
305 effect size = 0.18, 95 % credible interval = [-0.23, 0.59]).

306 Mediation and moderation analyses indicated that none of the reported group effects was  
307 based on confounding psychiatric symptoms (see supplementary material).



308 **Discussion**

309

310 The current study sought to investigate shared and distinct behavioral and neural response  
311 patterns underlying social anxiety and loneliness. Our results revealed that a previously  
312 observed neurocircuitry underlying avoidance behavior in social anxiety (cf. [31]) could not be  
313 replicated in lonely individuals. HL participants differed from control participants neither in the  
314 subjective value of engaging in social situations nor in neural responses to social decision-  
315 making and positive social feedback. Conversely, HL participants showed altered  
316 responsiveness to negative social feedback evident in opposing behavioral response patterns  
317 and striatal brain activity and connectivity compared to control participants.

318 Our results thus indicate that loneliness might be more associated with altered emotional  
319 reactivity to social situations than with behavioral tendencies to withdraw from social  
320 interactions. Human and animal research have consistently shown that the amygdala is  
321 crucially involved in the processing of threat-related stimuli and hyperactivation of the  
322 amygdala is known as a core mechanism underlying anxiety disorders [30,47]. Moreover,  
323 amygdala habituation to threat-related stimuli and amygdala connectivity with prefrontal  
324 regions predict subsequent avoidance behavior [48-50]. Likewise, we have previously found  
325 that amygdala activation during decisions in the social gambling task increases with social  
326 anxiety symptomatology and negatively correlates with the subjective value to engage in social  
327 situations [31]. By contrast, the subjective value of engaging in a social situation did not differ  
328 between HL participants and controls and Bayesian analyses revealed evidence for  
329 comparable amygdala activation during the decision and feedback stages. In line with our  
330 findings, neuroanatomical correlates of social avoidance behavior were previously found to be  
331 unaffected by loneliness [51]. This notion is consistent with etiological theories that highlight  
332 maladaptive social cognitions in the development and maintenance of loneliness [27,52].  
333 Likewise, cognitive-behavioral interventions were found to be more effective in targeting social

334 biases than social skill trainings [53,54]. There is preliminary evidence that established  
335 cognitive-behavioral treatments targeting social anxiety concurrently decrease feelings of  
336 loneliness and vice versa [55-59], but our findings of distinct behavioral and neural substrates  
337 suggest that loneliness-adjusted protocols might improve therapeutic outcomes.

338 Moreover, our results provide new insights into the neural pathways underlying loneliness.  
339 Unexpectedly, striatal activity during negative social feedback was reduced while pleasantness  
340 ratings were increased in HL participants. Notably, activation of the NAcc is associated with  
341 goal-directed approach and avoidance behavior and involved in avoiding social punishment  
342 [60-62]. As HL participants rated the negative social feedback videos as more pleasant than  
343 the control participants, reduced NAcc responses to negative social feedback might thus reflect  
344 reduced tendencies to avoid this negative social feedback. Furthermore, the enhanced  
345 functional coupling of the NAcc with a hippocampal cluster that correlated with individual  
346 pleasantness ratings is in line with the involvement of this neural circuit in hedonic processing  
347 [63] and might reflect the rewarding experience of a social feedback for socially deprived  
348 individuals [64]. Nevertheless, we have recently found a compromised neural integration of  
349 social information in HL participants evident in various brain regions including the NAcc [37].  
350 Furthermore, loneliness has been associated with a reduced recognition of negative vocal  
351 expressions [65]. Thus, the reduced NAcc activity might also reflect diminished differentiation  
352 between positive and negative feedback, resulting in a dysregulated reward system  
353 responsiveness to negative social stimuli as observed for the NAcc-hippocampus connectivity.  
354 However, inference about cognitive processes from neural activation should always be drawn  
355 with restraint [66] and results regarding biased emotion recognition in loneliness are  
356 inconclusive [67]. Future studies are warranted to further investigate the impact of loneliness  
357 on the processing of negative social feedback.

358 Interestingly, differences between HL and control participants were restricted to behavioral and  
359 neural responses to negative social feedback, whereas Bayesian analyses revealed evidence

360 for a comparable responsiveness to positive social feedback between groups. Conversely,  
361 social anxiety has been consistently found to affect the processing of social rewards [31-34].  
362 Previous studies point to various negative effects of loneliness on the processing of positive  
363 social interactions [37,68,69], but findings about the association between loneliness and NAcc  
364 reactivity to positive social stimuli are mixed. The involvement of the NAcc in loneliness might  
365 be context-dependent, with feelings of social isolation promoting the hedonic experience of  
366 positive social stimuli in an acute stage [64], which may be different from chronic loneliness.  
367 Similarly, lonely individuals might experience a social stimulus as more rewarding only if the  
368 stimulus is already familiar (e.g. a romantic partner and not a stranger [70]). Along these lines,  
369 a recent study found no relationship of loneliness with striatal responsiveness to pictures  
370 depicting strangers during positive social interactions [71]. Nevertheless, in our task design  
371 positive feedback was always coupled with monetary gains. Thus, differences regarding  
372 positive social feedback might have been obfuscated by the rewarding experience of earning  
373 money as evident in enhanced striatal responsiveness to positive feedback, irrespective of the  
374 partner providing the feedback. Both external (e.g., passive viewing of positive social  
375 interactions vs. being involved in a positive social interaction) and internal factors (e.g., state  
376 vs. chronic feelings of social isolation) may influence the association of loneliness with social  
377 reward processing.

378 Moreover, given the quasi-experimental, cross-sectional design of our study, our findings do  
379 not allow casual inferences about the relationship of loneliness and social feedback  
380 processing. In addition, moderation and mediation analyses indicate that the observed  
381 associations with loneliness were not driven by psychiatric symptoms that were also more  
382 pronounced in HL individuals. However, our study specifically focused on high-lonely healthy  
383 individuals who may represent a resilient subsample of the population because they did not  
384 develop acute psychiatric disorders. Thus, clinical studies with psychiatric patients are  
385 warranted to uncover the direction of the observed associative relationships and to further  
386 disentangle shared and distinct mechanisms underlying loneliness and psychopathology.

387 Collectively, the current results suggest that loneliness and social anxiety are distinct  
388 constructs with specific behavioral and neural substrates. Along these lines, interventions  
389 targeting loneliness-specific cognitive biases may be more effective in reducing loneliness than  
390 cognitive behavioral therapies focused on reducing avoidance behavior.

391

392 **Statements**

393

394 **Funding and Disclosure**

395 S.G.S-T, R.H., and D.S. are supported by a German-Israel Foundation for Scientific Research  
396 and Development grant (GIF, I-1428-105.4/2017). The authors have no conflicts of interest to  
397 declare.

398

399 **Acknowledgement**

400 The authors thank Alexandra Goertzen-Patin for proofreading the manuscript.

401

402 **Author Contributions**

403 J.L., J.S., and D.S. designed the experiment; J.L., T.E., and E.K. conducted the experiments;  
404 J.L. and D.S. analyzed the data. All authors wrote the manuscript. All authors read and  
405 approved the manuscript in its current version.

## References

- 1 Morr M, Lieberz J, Dobbstein M, Philipson A, Hurlemann R, Scheele D. Insula reactivity mediates subjective isolation stress in alexithymia. *Sci Rep*. 2021;11:15326.
- 2 Holt-Lunstad J. Why Social Relationships Are Important for Physical Health: A Systems Approach to Understanding and Modifying Risk and Protection. *Annu Rev Psychol*. 2018;69:437-458.
- 3 Solmi M, Veronese N, Galvano D, Favaro A, Ostinelli EG, Noventa V, et al. Factors Associated With Loneliness: An Umbrella Review Of Observational Studies. *J Affect Disord*. 2020;271:131-138.
- 4 Holt-Lunstad J, Smith TB, Baker M, Harris T, Stephenson D. Loneliness and Social Isolation as Risk Factors for Mortality: A Meta-Analytic Review. *Perspect Psychol Sci*. 2015;10:227-237.
- 5 Holt-Lunstad J, Smith TB, Layton JB. Social relationships and mortality risk: A meta-analytic review. *PLoS Med*. 2010;7:e1000316.
- 6 Jeste DV, Lee EE, Cacioppo S. Battling the Modern Behavioral Epidemic of Loneliness: Suggestions for Research and Interventions. *JAMA Psychiatry*. 2020;77:553-554.
- 7 Mihalopoulos C, Le LK, Chatterton ML, Bucholc J, Holt-Lunstad J, Lim MH, et al. The economic costs of loneliness: A review of cost-of-illness and economic evaluation studies. *Soc Psychiatry Psychiatr Epidemiol*. 2020;55:823-836.
- 8 Blazer D. Social isolation and loneliness in older adults - a mental health/public health challenge. *JAMA Psychiatry*. 2020;77:990-991.
- 9 Galea S, Merchant RM, Lurie N. The Mental Health Consequences of COVID-19 and Physical Distancing: The Need for Prevention and Early Intervention. *JAMA Intern Med*. 2020;180:817-818.
- 10 Vindegaard N, Benros ME. COVID-19 pandemic and mental health consequences: Systematic review of the current evidence. *Brain Behav Immun*. 2020;89:531-542.

- 11 Killgore WDS, Cloonan SA, Taylor EC, Lucas DA, Dalley NS. Loneliness during the first half-year of COVID-19 Lockdowns. *Psychiatry Res.* 2020;294:113551.
- 12 Losada-Baltar A, Martinez-Huertas JA, Jimenez-Gonzalo L, Pedroso-Chaparro MDS, Gallego-Alberto L, Fernandes-Pires J, et al. Longitudinal correlates of loneliness and psychological distress during the lockdown situation due to COVID-19. Effects of age and self-perceptions of aging. *J Gerontol B Psychol Sci Soc Sci.* 2021:gab012.
- 13 Tull MT, Edmonds KA, Scamaldo KM, Richmond JR, Rose JP, Gratz KL. Psychological outcomes associated with stay-at-home orders and the perceived impact of COVID-19 on daily life. *Psychiatry Res.* 2020;289:113098.
- 14 Bu F, Steptoe A, Fancourt D. Loneliness during a strict lockdown: Trajectories and predictors during the COVID-19 pandemic in 38,217 United Kingdom adults. *Soc Sci Med.* 2020:113521.
- 15 Danneel S, Geukens F, Maes M, Bastin M, Bijttebier P, Colpin H, et al. Loneliness, Social Anxiety Symptoms, and Depressive Symptoms in Adolescence: Longitudinal Distinctiveness and Correlated Change. *J Youth Adolesc.* 2020;49:2246-2264.
- 16 Maes M, Nelemans SA, Danneel S, Fernandez-Castilla B, Van den Noortgate W, Goossens L, et al. Loneliness and social anxiety across childhood and adolescence: Multilevel meta-analyses of cross-sectional and longitudinal associations. *Dev Psychol.* 2019;55:1548-1564.
- 17 Bruce LD, Wu JS, Lustig SL, Russell DW, Nemecek DA. Loneliness in the United States: a 2018 national panel survey of demographic, structural, cognitive, and behavioral characteristics. *Am J Health Promot.* 2019;33:1123-1133.
- 18 Danneel S, Nelemans S, Spithoven A, Bastin M, Bijttebier P, Colpin H, et al. Internalizing Problems in Adolescence: Linking Loneliness, Social Anxiety Symptoms, and Depressive Symptoms Over Time. *J Abnorm Child Psychol.* 2019;47:1691-1705.
- 19 Lim MH, Rodebaugh TL, Zyphur MJ, Gleeson JF. Loneliness over time: The crucial role of social anxiety. *J Abnorm Psychol.* 2016;125:620-630.

- 20 Li M, Ren Y, Sun H. Social Anxiety Status of Left-Behind Children in Rural Areas of Hunan Province and its Relationship with Loneliness. *Child Psychiatry Hum Dev.* 2020;51:1016-1024.
- 21 Teo AR, Lerrigo R, Rogers MA. The role of social isolation in social anxiety disorder: a systematic review and meta-analysis. *J Anxiety Disord.* 2013;27:353-364.
- 22 Rapee RM, Peters L, Carpenter L, Gaston JE. The Yin and Yang of support from significant others: Influence of general social support and partner support of avoidance in the context of treatment for social anxiety disorder. *Behav Res Ther.* 2015;69:40-47.
- 23 Porter E, Chambless DL. Shying away from a good thing: social anxiety in romantic relationships. *J Clin Psychol.* 2014;70:546-561.
- 24 Rodebaugh TL, Lim MH, Shumaker EA, Levinson CA, Thompson T. Social Anxiety and Friendship Quality over Time. *Cogn Behav Ther.* 2015;44:502-511.
- 25 Peplau LA, Caldwell MA. Loneliness: A cognitive analysis. *Essence.* 1978;2:207-220.
- 26 Evans M, Fisher EB. Social Isolation and Mental Health: The Role of Nondirective and Directive Social Support. *Community Ment Health J.* 2021.
- 27 Cacioppo JT, Cacioppo S. Chapter Three - Loneliness in the Modern Age: An Evolutionary Theory of Loneliness (ETL). In: Olson JM, editor *Adv Exp Soc Psychol.* Cambridge, MA: Academic Press; 2018. p. 127-197.
- 28 Clark DM, Wells A. A Cognitive Model of Social Phobia. In: Heimberg RG, Liebowitz MR, Hope DA, Schneider FR, editors. *Social phobia: Diagnosis, assessment, and treatment.* New York, NY: The Guilford Press; 1995. p. 69-94.
- 29 Bruhl AB, Delsignore A, Komossa K, Weidt S. Neuroimaging in social anxiety disorder- a meta-analytic review resulting in a new neurofunctional model. *Neurosci Biobehav Rev.* 2014;47:260-280.
- 30 Etkin A, Wager TD. Functional Neuroimaging of Anxiety: A Meta-Analysis of Emotional Processing in PTSD, Social Anxiety Disorder, and Specific Phobia. *Am J Psychiatry.* 2007;164:1476-1488.



- 31 Schultz J, Willems T, Gadeke M, Chakkour G, Franke A, Weber B, et al. A human subcortical network underlying social avoidance revealed by risky economic choices. *eLife*. 2019;8:e45249.
- 32 Richey JA, Ghane M, Valdespino A, Coffman MC, Strege MV, White SW, et al. Spatiotemporal dissociation of brain activity underlying threat and reward in social anxiety disorder. *Soc Cogn Affect Neurosci*. 2017;12:81-94.
- 33 Richey JA, Rittenberg A, Hughes L, Damiano CR, Sabatino A, Miller S, et al. Common and distinct neural features of social and non-social reward processing in autism and social anxiety disorder. *Soc Cogn Affect Neurosci*. 2014;9:367-377.
- 34 Sripada C, Angstadt M, Liberzon I, McCabe K, Phan KL. Aberrant reward center response to partner reputation during a social exchange game in generalized social phobia. *Depress Anxiety*. 2013;30:353-361.
- 35 Kashdan TB, Collins RL. Social anxiety and the experience of positive emotion and anger in everyday life: an ecological momentary assessment approach. *Anxiety Stress Coping*. 2010;23:259-272.
- 36 Romano M, Tran E, Moscovitch DA. Social anxiety is associated with impaired memory for imagined social events with positive outcomes. *Cogn Emot*. 2020;34:700-712.
- 37 Lieberz J, Shamay-Tsoory SG, Saporta N, Esser T, Kuskova E, Stoffel-Wagner B, et al. Loneliness and the social brain: how perceived social isolation impairs human interactions. *bioRxiv*. <https://doi.org/10.1101/2021.03.03.433569>.
- 38 Lam JA, Murray ER, Yu KE, Ramsey M, Nguyen TT, Mishra J, et al. Neurobiology of loneliness: a systematic review. *Neuropsychopharmacology*. 2021.
- 39 Russell D, Peplau LA, Cutrona CE. The Revised UCLA Loneliness Scale: Concurrent and Discriminant Validity Evidence. *J Pers Soc Psychol*. 1980;39:472-480.
- 40 Maldjian JA, Laurienti PJ, Burdette JH. Precentral gyrus discrepancy in electronic versions of the Talairach atlas. *Neuroimage*. 2004;21:450-455.

- 41 Maldjian JA, Laurenti PJ, Kraft RA, Burdette JH. An automated method for neuroanatomic and cytoarchitectonic atlas-based interrogation of fMRI data sets. *Neuroimage*. 2003;19:1233-1239.
- 42 Hebart MN, Gorgen K, Haynes JD. The Decoding Toolbox (TDT): a versatile software package for multivariate analyses of functional imaging data. *Front Neuroinform*. 2014;8:88.
- 43 Beck A, Steer RA, Brown GK. Beck Depression Inventory-II. Psychological Corporation: San Antonio, TX; 1996.
- 44 Liebowitz MR. Social phobia. *Mod Probl Pharmacopsychiatry*. 1987;22:141-173.
- 45 Bernstein DP, Fink L, Handelsman L, Foote J, Lovejoy M, Wenzel K, et al. Initial Reliability and Validity of a New Retrospective Measure of Child Abuse and Neglect. *Am J Psychiatry*. 1994;151:1132-1136.
- 46 JASP Team. JASP (Version 0.14.1)[Computer software]. 2020. <https://jasp-stats.org/>.
- 47 Phelps EA, LeDoux JE. Contributions of the Amygdala to Emotion Processing: From Animal Models to Human Behavior. *Neuron*. 2005;48:175-187.
- 48 Björkstrand J, Agren T, Frick A, Hjorth O, Furmark T, Fredrikson M, et al. Decrease in amygdala activity during repeated exposure to spider images predicts avoidance behavior in spider fearful individuals. *Translational Psychiatry*. 2020;10.
- 49 Lisk S, Kadosh KC, Zich C, Haller SP, Lau JY. Training negative connectivity patterns between the dorsolateral prefrontal cortex and amygdala through fMRI-based neurofeedback to target adolescent socially-avoidant behaviour. *Behav Res Ther*. 2020;135:103760.
- 50 Mao Y, Zuo XN, Ding C, Qiu J. OFC and its connectivity with amygdala as predictors for future social anxiety in adolescents. *Dev Cogn Neurosci*. 2020;44:100804.
- 51 Tian X, Hou X, Wang K, Wei D, Qiu J. Neuroanatomical correlates of individual differences in social anxiety in a non-clinical population. *Soc Neurosci*. 2016;11:424-437.

- 52 Spithoven AWM, Cacioppo S, Goossens L, Cacioppo JT. Genetic contributions to loneliness and their relevance to the evolutionary theory of loneliness. *Perspect Psychol Sci.* 2019;14:376-396.
- 53 Masi CM, Chen HY, Hawkley LC, Cacioppo JT. A meta-analysis of interventions to reduce loneliness. *Pers Soc Psychol Rev.* 2011;15:219-266.
- 54 Veronese N, Galvano D, D'Antiga F, Vecchiato C, Furegon E, Allocco R, et al. Interventions for reducing loneliness: An umbrella review of intervention studies. *Health Soc Care Community.* 2020;00:1-8.
- 55 O'Day EB, Butler RM, Morrison AS, Goldin PR, Gross JJ, Heimberg RG. Reductions in social anxiety during treatment predict lower levels of loneliness during follow-up among individuals with social anxiety disorder. *J Anxiety Disord.* 2021;78:102362.
- 56 Alfano CA, Pina AA, Villalta IK, Beidel DC, Ammerman RT, Crosby LE. Mediators and moderators of outcome in the behavioral treatment of childhood social phobia. *J Am Acad Child Adolesc Psychiatry.* 2009;48:945-953.
- 57 Suveg C, Kingery JN, Davis M, Jones A, Whitehead M, Jacob ML. Still lonely: Social adjustment of youth with and without social anxiety disorder following cognitive behavioral therapy. *J Anxiety Disord.* 2017;52:72-78.
- 58 Haslam C, Cruwys T, Chang MX, Bentley SV, Haslam SA, Dingle GA, et al. GROUPS 4 HEALTH reduces loneliness and social anxiety in adults with psychological distress: findings from a randomized controlled trial. *J Consult Clin Psychol.* 2019;87:787-801.
- 59 Kall A, Back M, Welin C, Aman H, Bjerkander R, Wanman M, et al. Therapist-Guided Internet-Based Treatments for Loneliness: A Randomized Controlled Three-Arm Trial Comparing Cognitive Behavioral Therapy and Interpersonal Psychotherapy. *Psychother Psychosom.* 2021:1-8.
- 60 Floresco SB. The nucleus accumbens: an interface between cognition, emotion, and action. *Annu Rev Psychol.* 2015;66:25-52.

- 61 Kohls G, Perino MT, Taylor JM, Madva EN, Cayless SJ, Troiani V, et al. The nucleus accumbens is involved in both the pursuit of social reward and the avoidance of social punishment. *Neuropsychologia*. 2013;51:2062-2069.
- 62 Damiano CR, Cockrell DC, Dunlap K, Hanna EK, Miller S, Bizzell J, et al. Neural mechanisms of negative reinforcement in children and adolescents with autism spectrum disorders. *J Neurodev Disord*. 2015;7:12.
- 63 Yang AK, Mendoza JA, Lafferty CK, Lacroix F, Britt JP. Hippocampal Input to the Nucleus Accumbens Shell Enhances Food Palatability. *Biol Psychiatry*. 2020;87:597-608.
- 64 Tomova L, Wang KL, Thompson T, Matthews GA, Takahashi A, Tye KM, et al. Acute social isolation evokes midbrain craving responses similar to hunger. *Nat Neurosci*. 2020;23:1597-1605.
- 65 Morningstar M, Nowland R, Dirks MA, Qualter P. Loneliness and the recognition of vocal socioemotional expressions in adolescence. *Cogn Emot*. 2020;34:970-976.
- 66 Poldrack RA. Can cognitive processes be inferred from neuroimaging data? *Trends Cogn Sci*. 2006;10:59-63.
- 67 Spithoven AWM, Bijttebier P, Goossens L. It is all in their mind: A review on information processing bias in lonely individuals. *Clin Psychol Rev*. 2017;58:97-114.
- 68 Cacioppo JT, Norris CJ, Decety J, Monteleone G, Nusbaum H. In the Eye of the Beholder: Individual Differences in Perceived Social Isolation Predict Regional Brain Activation to Social Stimuli. *J Cogn Neurosci*. 2009;21:83-92.
- 69 Silva HD, Campagnoli RR, Mota BEF, Araujo CRV, Alvares RSR, Mocaiber I, et al. Bonding Pictures: Affective Ratings Are Specifically Associated to Loneliness But Not to Empathy. *Front Psychol*. 2017;8:1136.
- 70 Inagaki TK, Muscatell KA, Moieni M, Dutcher JM, Jevtic I, Irwin MR, et al. Yearning for connection? Loneliness is associated with increased ventral striatum activity to close others. *Soc Cogn Affect Neurosci*. 2016;11:1096-1101.

71 D'Agostino AE, Kattan D, Canil T. An fMRI study of loneliness in younger and older adults. Soc Neurosci. 2018:1-13.
